# Supplementary material
Source: HighWire-hosted journal article supplement (http://www.qdcxjkg.com/highwire/filestream/113721/field_highwire_adjunct_files/0/Online_supplement_SR_Clean_copy.pdf)
Supplement: Online_supplement_SR_Clean_copy.pdf [file Online_supplement_SR_Clean_copy.pdf]

## **Online Supplement**

### **Scoring systems using chest radiographic features for the diagnosis of pulmonary tuberculosis in adults: A systematic review**

Lancelot M Pinto<sup>1,2</sup>, Madhukar Pai<sup>1,2</sup>, Keertan Dheda<sup>3</sup>, Kevin Schwartzman<sup>1,4</sup>, Dick Menzies<sup>1,2,4</sup>, Karen R Steingart<sup>5</sup>

<sup>1</sup>Respiratory Epidemiology & Clinical Research Unit, Montreal Chest Institute, Montreal, Canada

<sup>2</sup>Department of Epidemiology and Biostatistics, McGill University, Montreal, Canada

<sup>3</sup>University of Cape Town Lung Institute, Cape Town, South Africa

<sup>4</sup>Respiratory Division, Department of Medicine, McGill University, Montreal, Canada

<sup>5</sup>Department of Health Services, University of Washington School of Public Health, Seattle, USA

The online supplement contains in order:

1. Detailed search strategy for the systematic review
2. Table of the demographic characteristics of participants in the included studies
3. Table of the association of upper lobe opacities visualized on the chest radiograph and active pulmonary TB
4. Table of the association of the presence of a cavity visualized on the chest radiograph and active pulmonary TB
5. Table of performance characteristics of scoring systems, classified by income status of country of study
6. Forest plot of the diagnostic odds ratio for active pulmonary TB among all TB patients with a cavity visualized on the chest radiograph
7. Forest plot of the diagnostic odds ratio for active pulmonary TB among smear-negative TB suspects with a cavity visualized on the chest radiograph

## **1. Search strategy for the systematic review**

### **a. NEW MEDLINE search strategy:**

1. sensitiv:.mp.
2. diagnos:.mp.
3. di.fs.
4. 1 or 2 or 3
5. radiograph:.tw.
6. radiolog:.tw.
7. Mass Chest X-Ray/
8. chest x-ray.tw.
9. scor:.tw.
10. Radiography, Thoracic/
11. chest xray.tw.
12. 5 or 6 or 7 or 8 or 9 or 10 or 11
13. pulmonary tuberculosis.tw.
14. pulmonary tb.tw.
15. lung tuberculosis.tw.
16. lung tb.tw.
17. Tuberculosis, Lymph Node/
18. Tuberculosis, Miliary/
19. Tuberculosis, Multidrug-Resistant/
20. Tuberculosis, Pleural/
21. Tuberculosis, Pulmonary/
22. Mycobacterium tuberculosis/
23. miliary tuberculosis.tw.
24. tuberculous pleurisy.tw.
25. tuberculous pleural effusion.tw.
26. pleural tuberculosis.tw.
27. tuberculous lymphadenitis.tw.
28. lymph node tuberculosis.tw.
29. lymph node tb.tw.
30. miliary tb.tw.
31. pleural tb.tw.
32. 13 or 14 or 15 or 16 or 17 or 18 or 19 or 20 or 21 or 22 or 23 or 24 or 25 or 26 or 27 or 28 or 29 or 30 or 31
33. 4 and 12 and 32

### **b. OLD MEDLINE/ MEDLINE in-process search strategy:**

1. radiograph:.tw.
2. radiolog:.tw.
3. Mass Chest X-Ray/
4. chest x-ray.tw.

5. scor:.tw.
6. Radiography, Thoracic/
7. chest xray.tw.
8. 1 or 2 or 3 or 4 or 5 or 6 or 7
9. pulmonary tuberculosis.tw.
10. pulmonary tb.tw.
11. lung tuberculosis.tw.
12. lung tb.tw.
13. Tuberculosis, Lymph Node/
14. Tuberculosis, Miliary/
15. Tuberculosis, Multidrug-Resistant/
16. Tuberculosis, Pleural/
17. Tuberculosis, Pulmonary/
18. Mycobacterium tuberculosis/
19. miliary tuberculosis.tw.
20. tuberculous pleurisy.tw.
21. tuberculous pleural effusion.tw.
22. pleural tuberculosis.tw.
23. tuberculous lymphadenitis.tw.
24. lymph node tuberculosis.tw.
25. lymph node tb.tw.
26. miliary tb.tw.
27. pleural tb.tw.
28. 9 or 10 or 11 or 12 or 13 or 14 or 15 or 16 or 17 or 18 or 19 or 20 or 21 or 22 or 23 or 24 or 25 or 26 or 27
29. 8 and 28

**c. EMBASE search strategy:**

1. specificity.tw.
2. predict:.tw.
3. di.fs.
4. 1 or 2 or 3
5. radiograph:.tw.
6. radiolog:.tw.
7. chest x-ray.tw.
8. scor:.tw.
9. thorax radiography/
10. chest xray.tw.
11. 5 or 6 or 7 or 8 or 9 or 10
12. pulmonary tuberculosis.tw.
13. pulmonary tb.tw.
14. lung tuberculosis.tw.
15. lung tb.tw.

16. tuberculous lymphadenitis/
17. miliary tuberculosis/
18. multidrug resistant tuberculosis/
19. tuberculous pleurisy/
20. lung tuberculosis/
21. Mycobacterium tuberculosis/
22. miliary tuberculosis.tw.
23. tuberculous pleurisy.tw.
24. tuberculous pleural effusion.tw.
25. pleural tuberculosis.tw.
26. tuberculous lymphadenitis.tw.
27. lymph node tuberculosis.tw.
28. lymph node tb.tw.
29. miliary tb.tw.
30. pleural tb.tw.
31. 12 or 13 or 14 or 15 or 16 or 17 or 18 or 19 or 20 or 21 or 22 or 23 or 24 or 25 or 26 or 27 or 28 or 30
32. 4 and 11 and 31

**d. Web of Science search strategy:**

#1 Topic=(pulmonary tuberculosis) OR Topic=(pulmonary tb) OR Topic=(lung tuberculosis) OR Topic=(lung tb) OR Topic=(tuberculous lymphadenitis) OR Topic=(tb lymphadenitis) OR Topic=(tb lymph node) OR Topic=(miliary tuberculosis) OR Topic=(miliary tb) OR Topic=(multidrug resistant tb) OR Topic=(multidrug resistant tuberculosis) OR Topic=(pleural tuberculosis) OR Topic=(pleural tb) OR Topic=(tuberculous pleurisy) OR Topic=(tb pleurisy) OR Topic=(mycobacterium tuberculosis)

#2 Topic=(sensitiv\*) OR Topic=(specific\*) OR Topic=(diagnos\*) OR Topic=(accura\*) OR Topic=(predict\*) OR Topic=(reliab\*) OR Topic=(reproducib\*)

#3 TS=(radiograph\*) OR TS=(radiolog\*) OR TS=(chest x-ray) OR TS=(chest xray) OR TS=(scor\*)

#4 #3 AND #2 AND #1

## **2. Demographic characteristics of participants in the included studies**

| <b>Study</b>                                            | <b>Age (years)</b>                                       | <b>No. of Males (%)</b>                    | <b>No. of Persons Living with HIV (%)</b> | <b>Patients with Active TB (%)</b> |
|---------------------------------------------------------|----------------------------------------------------------|--------------------------------------------|-------------------------------------------|------------------------------------|
| <b>Studies that included all TB suspects</b>            |                                                          |                                            |                                           |                                    |
| Bock et al (1996) <sup>15+</sup>                        | mean 41                                                  | 296 (79)                                   | 230 (61.0)                                | 53 (14.1)                          |
| El-Solh et al (1997) <sup>16##</sup>                    | mean(SD)<br>PLWH:<br>36.6(0.4)<br>non-PLWH:<br>50.4(1.2) | NR                                         | 316 (56.1)                                | 47 (8.3)                           |
| El-Solh et al (1999) <sup>17</sup>                      | NR                                                       | NR                                         | 66 (55.5)                                 | 11 (9.2)                           |
| Moran et al (2009) <sup>18##</sup>                      | median (IQR)<br>48(38-63)                                | 3567 (63)*                                 | 1058 (20.8)                               | 224 (4.4)                          |
| Mylotte et al (1997) <sup>19</sup>                      | mean(SD)<br>44(16)                                       | NR                                         | 129 (59.0)                                | 8 (3.6)                            |
| Solari et al (2008) <sup>20</sup>                       | median 33                                                | 222 (64.4)                                 | 45(13.0)                                  | 109 (31.6)                         |
| <b>Studies that included smear-negative TB suspects</b> |                                                          |                                            |                                           |                                    |
|                                                         | <b>mean (SD)</b>                                         |                                            |                                           |                                    |
| Lagrange-Xelot et al (2010) <sup>21</sup>               | 43 (14.0)                                                | 94 (70)                                    | 60 (40.0)                                 | 26 (19.0)                          |
| Soto et al (2008) <sup>22</sup>                         | NR                                                       | 166 (63.4)                                 | 28(10.9)**                                | 27 (10.3)                          |
| Soto et al (2011) <sup>23</sup>                         | 41.4 (17.2)                                              | 370 (55.8)                                 | 98 (24.0) <sup>#</sup>                    | 184 (27.8)                         |
| Wisnivesky et al (2000) <sup>25</sup>                   | cases – 40<br>(2)<br>controls – 40 (2)                   | 82 (73.2)                                  | NR                                        | 56 (50)                            |
| Wisnivesky et al (2005) <sup>24</sup>                   | 46.3 (11.9)                                              | 285 (55.2)                                 | 362(70.0)                                 | 19 (3.7)                           |
| <b>Study that excluded PLWH</b>                         |                                                          |                                            |                                           |                                    |
| Rakoczy et al (2008) <sup>26</sup>                      | cases – 60<br>controls – 51.8                            | cases -<br>33(67)<br>controls –<br>29 (59) | 0                                         | 33 (11.8)                          |

IQR, interquartile range; NR, not reported; PLWH, persons living with HIV

\* Sex not documented in 1.4% patients

\*\* 6 patients refused testing

<sup>#</sup> 255 patients refused testing

<sup>##</sup> The demographic characteristics represent those of the included subjects in the combined derivation and validation cohort

<sup>+</sup> The demographic characteristics represent those of the eligible participants

**3. Association of upper lobe opacities visualized on the chest radiograph and active pulmonary TB**

| Study                                                   | OR   | 95% CI                                  |
|---------------------------------------------------------|------|-----------------------------------------|
| <b>Studies that included all TB suspects</b>            |      |                                         |
| Bock et al (1996) <sup>15</sup>                         | 5.14 | 2.56,10.33                              |
|                                                         | 10.1 | 5.29,19.3                               |
| El-Solh et al (1997) <sup>16</sup> *                    | 18   | 5.47,59.36 when adenopathy also present |
| El-Solh et al (1999) <sup>17</sup>                      | 2.38 | 0.67,8.41                               |
| Moran et al (2009) <sup>18</sup> *,#                    | 7.7  | 5.9,10                                  |
| Solari et al (2008) <sup>20</sup>                       | 5.15 | 3.03,8.75                               |
| <b>Studies that included smear-negative TB suspects</b> |      |                                         |
| Lagrange-Xelot et al (2010) <sup>21</sup>               | 3.83 | 1.52,9.6                                |
| Soto et al (2008) <sup>22</sup> **                      | 4.81 | 1.93,11.92                              |
| Soto et al (2011) <sup>23</sup> **                      | 2.47 | 1.71,3.57                               |
| Wisnivesky et al (2000) <sup>25</sup> +                 | 9.07 | 2.5,32.9                                |
| Wisnivesky et al (2005) <sup>24</sup> +                 | 3.96 | 1.57, 9.98                              |

\* Reported “upper zone disease”

\*\*Reported “apical infiltrates”

+ Reported “upper lobe consolidation”

# The study reported relative risks (RR) as the measure of association

**4. Association of the presence of a cavity visualized on the chest radiograph and active pulmonary TB**

| <b>Study</b>                                            | <b>OR</b> | <b>95% CI</b> |
|---------------------------------------------------------|-----------|---------------|
| <b>Studies that included all TB patients</b>            |           |               |
| Bock et al (1996) <sup>15</sup>                         | 4.75      | 1.43,15.74    |
| Moran et al (2009) <sup>18*</sup>                       | 7.68      | 5.88,10.05    |
| Solari et al (2008) <sup>20</sup>                       | 2.11      | 1.25,3.55     |
| <b>Studies that included smear-negative TB suspects</b> |           |               |
| Lagrange-Xelot et al (2010) <sup>21</sup>               | 25.66     | 6.42,102.69   |
| Soto et al (2008) <sup>22</sup>                         | 1.97      | 0.76,4.87     |
| Wisnivesky et al (2000) <sup>25+</sup>                  | 2.04      | 0.7,5.96      |

\*The study reported relative risks (RR) as the measure of association



**5. Performance characteristics of scoring systems, classified by income status of country of study**

|                                                                              | <b>Median sensitivity (range)</b> | <b>Median specificity (range)</b> | <b>Number of studies</b>                                                                                           |
|------------------------------------------------------------------------------|-----------------------------------|-----------------------------------|--------------------------------------------------------------------------------------------------------------------|
| <b>Studies that included all patients with possible PTB</b>                  |                                   |                                   |                                                                                                                    |
| Middle- and low- income                                                      | 93                                | 42                                | 1 study <sup>25</sup>                                                                                              |
| High-income                                                                  | 96 (81-100)                       | 57 (49-72)                        | 5 studies with sensitivity data <sup>20,21,22,23,24</sup> , 4 studies with specificity data <sup>21,22,23,24</sup> |
| <b>Studies that only included smear- negative subjects with possible PTB</b> |                                   |                                   |                                                                                                                    |
| Middle- and low- income                                                      | 95 (93-98)                        | 32 (14-50)                        | 2 studies <sup>27,28</sup>                                                                                         |
| High-income                                                                  | 96 (95-98)                        | 35 (21-46)                        | 3 studies <sup>26,29,30</sup>                                                                                      |

**6. Diagnostic odds ratio for active pulmonary TB among all TB suspects with a cavity visualized on the chest radiograph**

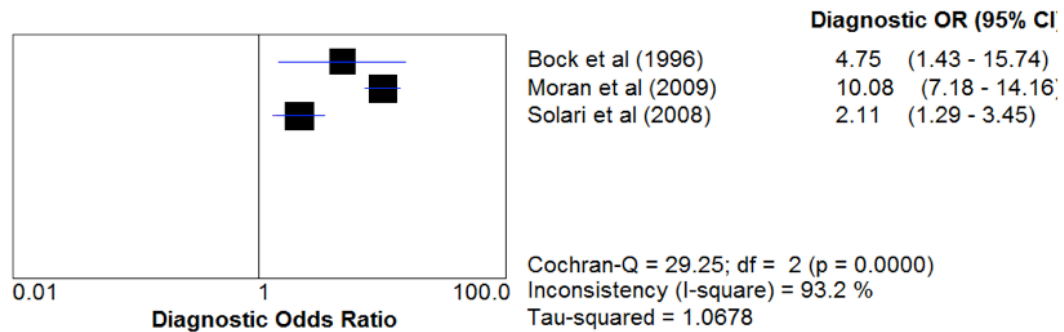

The size of the square is proportional to the sample size of the study such that larger studies are represented by larger squares.

The lines represent the confidence intervals around the estimates.

Pooling was not performed, as there was considerable heterogeneity.

**7. Diagnostic odds ratio for active pulmonary TB among smear-negative TB suspects with a cavity visualized on the chest radiograph**

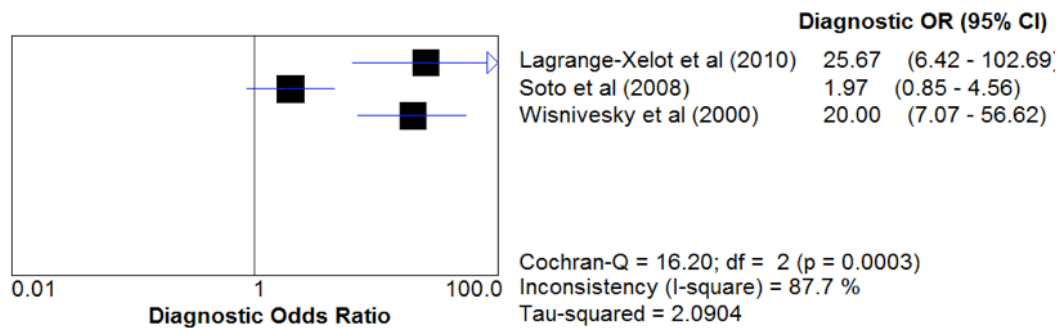

The size of the square is proportional to the sample size of the study such that larger studies are represented by larger squares.

The lines represent the confidence intervals around the estimates.

Pooling was not performed, as there was considerable heterogeneity.
